# Supplementary material
Source: PubMed Central journal article supplement (PMC9532381)

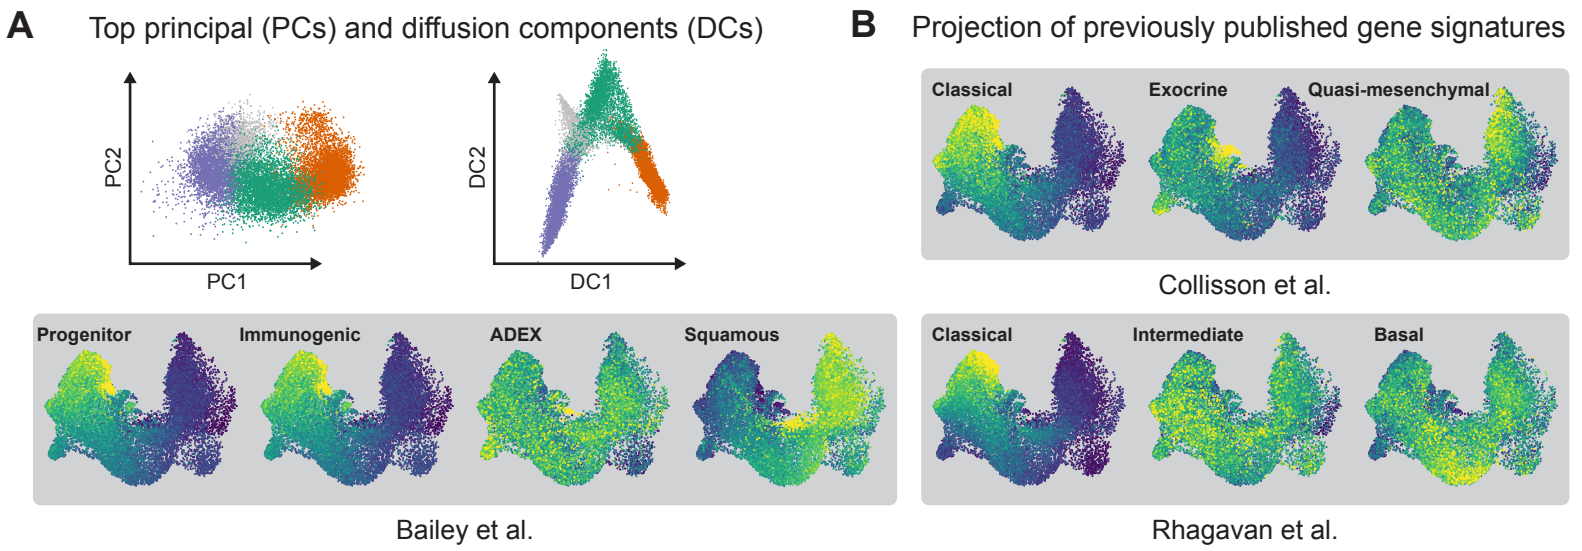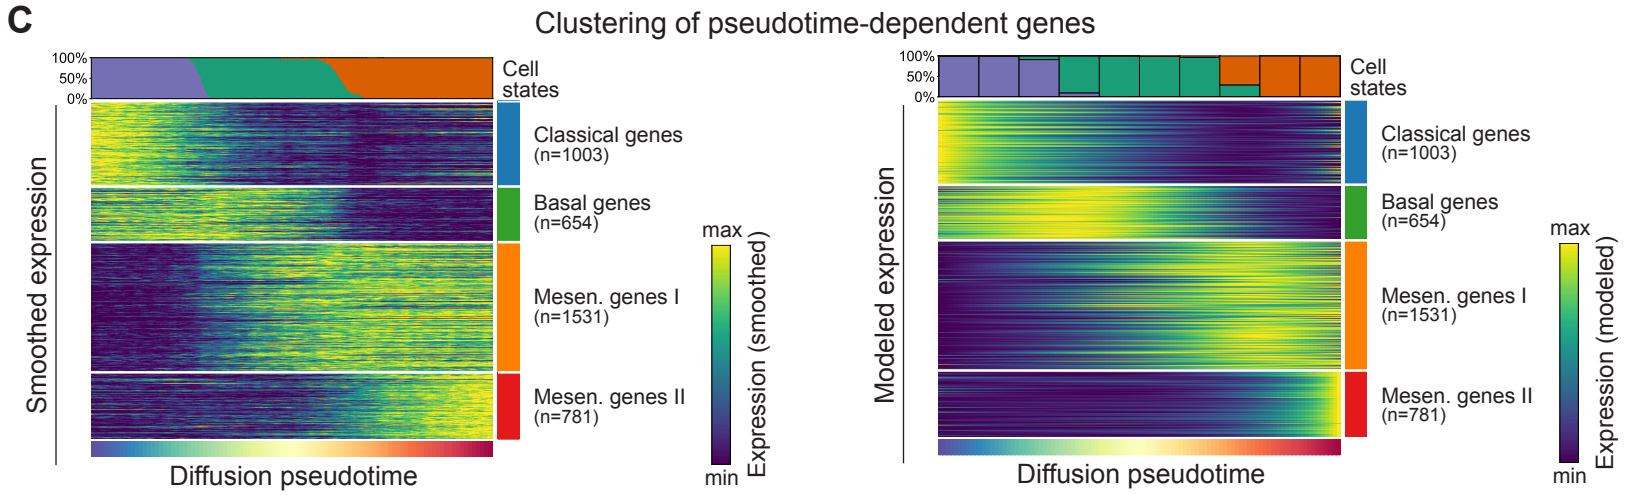

**D** Examples of gene expression modeled along pseudotime

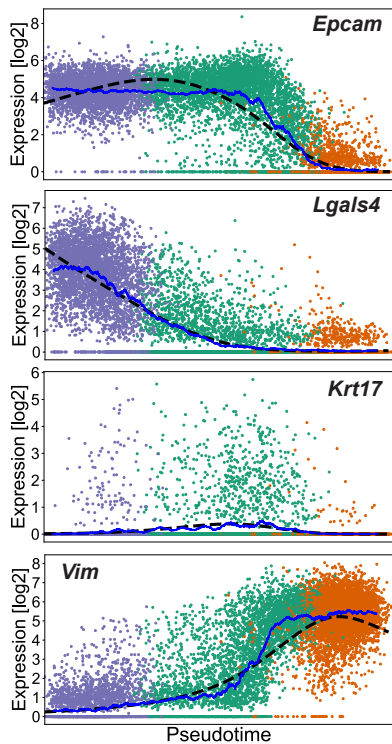

**E** Gene set enrichment analysis of gene clusters introduced in panel (C)

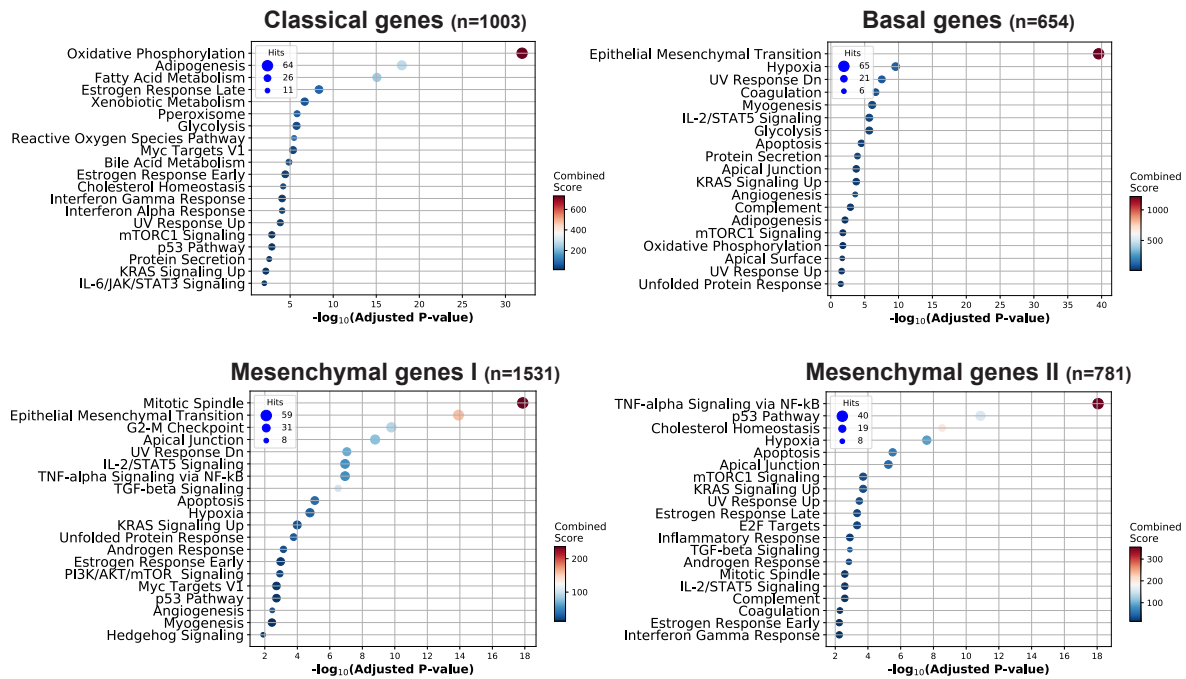

**F** Additional marker genes for classical, basal and mesenchymal cell states

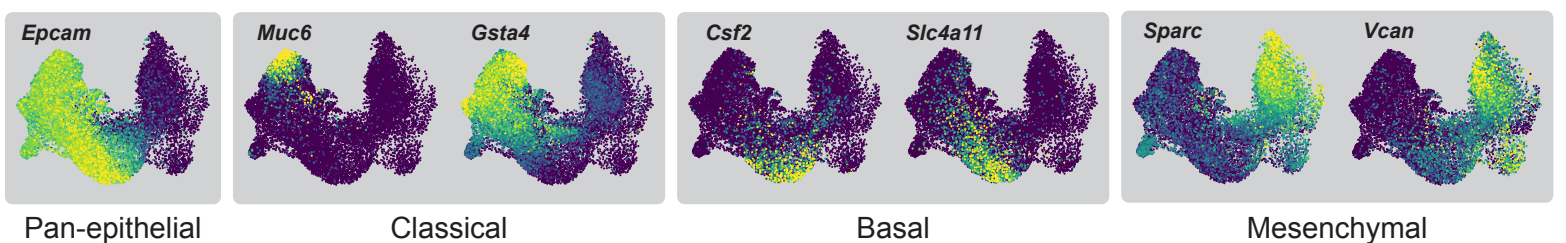

Supplement: NIHMS1831177-supplement-3.pdf [file NIHMS1831177-supplement-3.pdf]
