# Supplementary material
Source: PubMed Central journal article supplement (PMC9532381)

**A** Differentially expressed genes (DEGs) between autochthonous tumors and Td-Tomato-sorted transplants

DEGs over all cell states

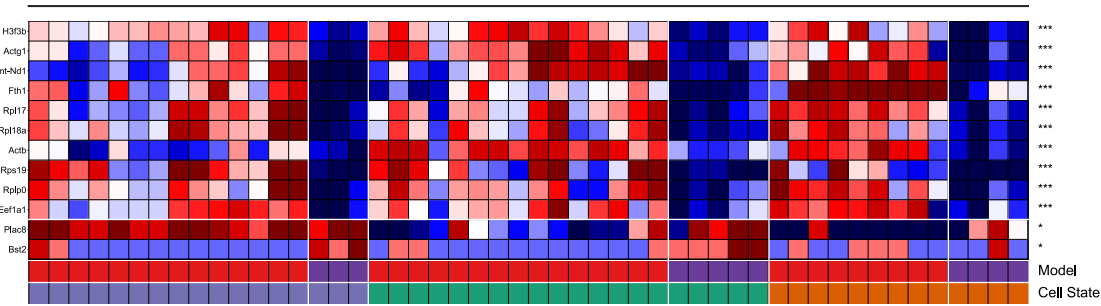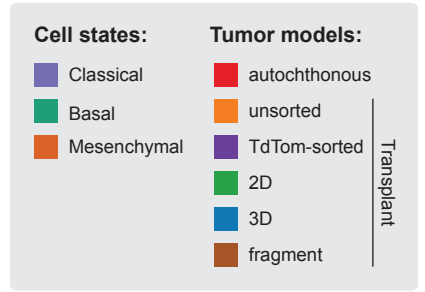

DEGs in classical cells

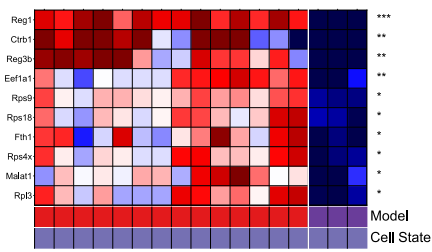

DEGs in basal cells

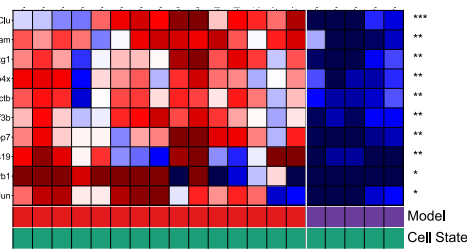

DEGs in mesenchymal cells

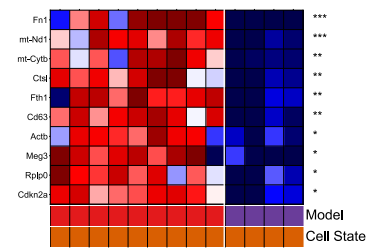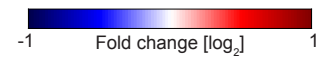

**B** Differentially expressed genes (DEGs) between cell states

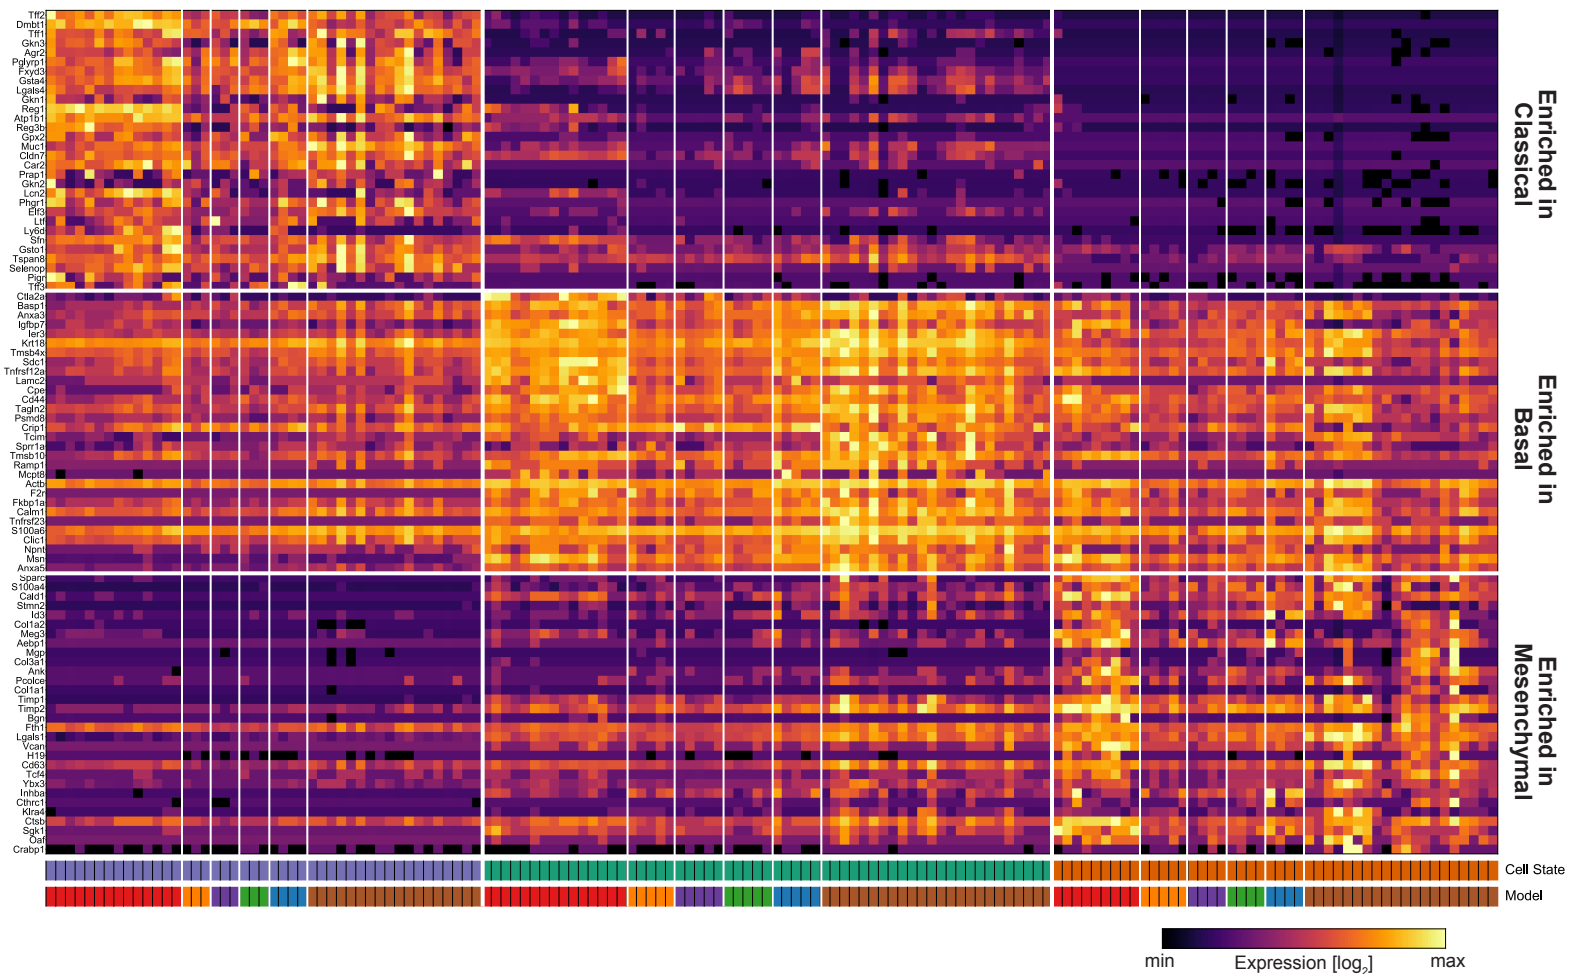

Supplement: NIHMS1831177-supplement-5.pdf [file NIHMS1831177-supplement-5.pdf]
