# Supplementary material
Source: PubMed Central journal article supplement (PMC9532381)

**A** Comparison of orthotopic transplants into F1 mice  
Orthotopic transplants (F1)

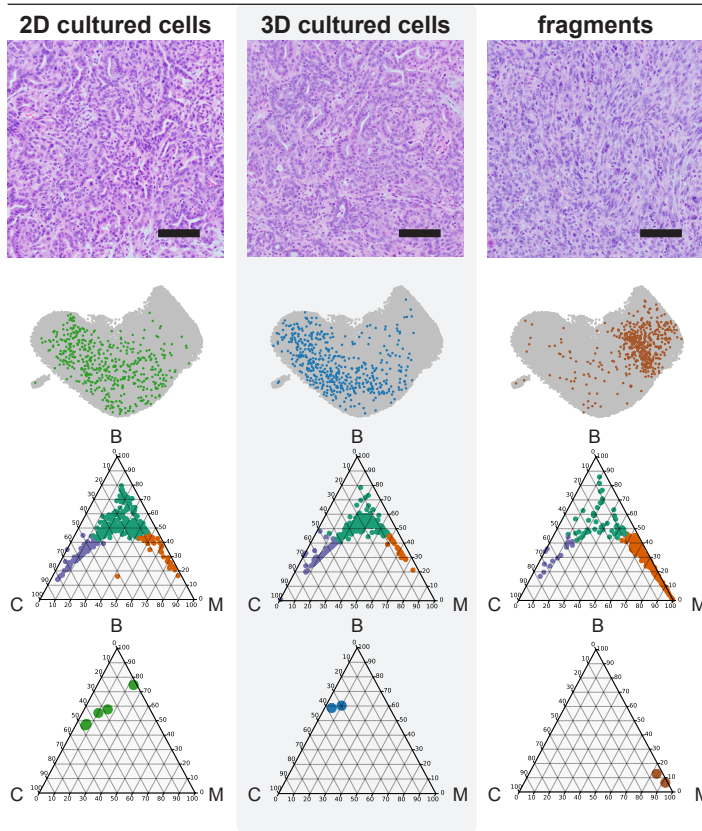

**B** Phenotypic volume of tumor models

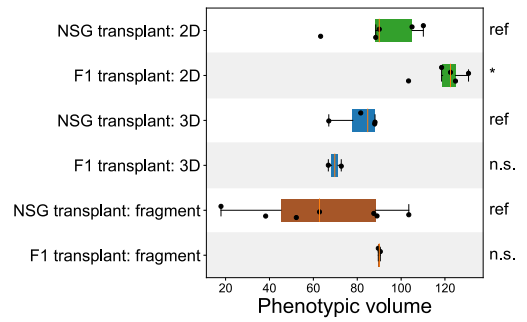

**C** Cell state heterogeneity of tumor models

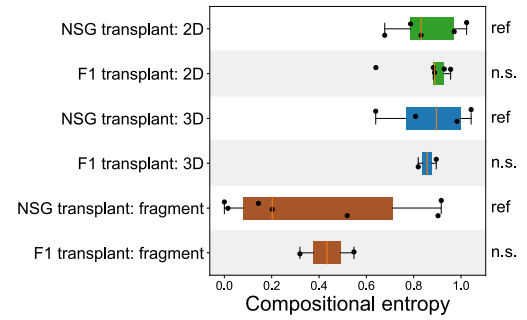

**D** Differentially expressed genes (DEGs) between 2D cells transplanted into NSG and F1 mice

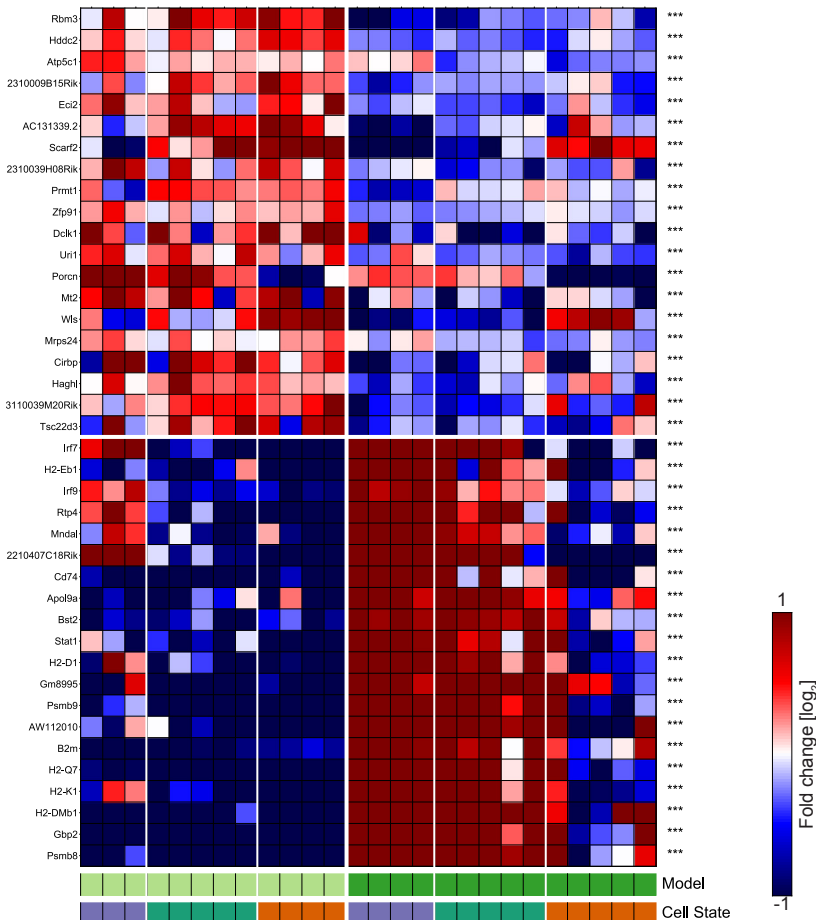

**E** Gene sets upregulated in NSG transplants

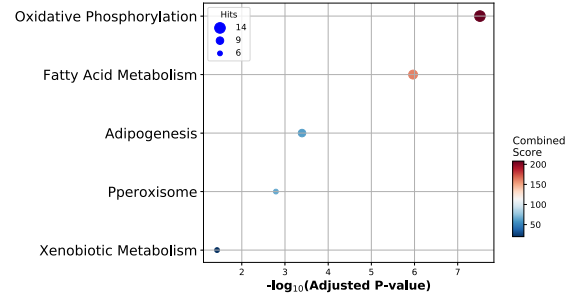

**F** Gene sets upregulated in F1 transplants

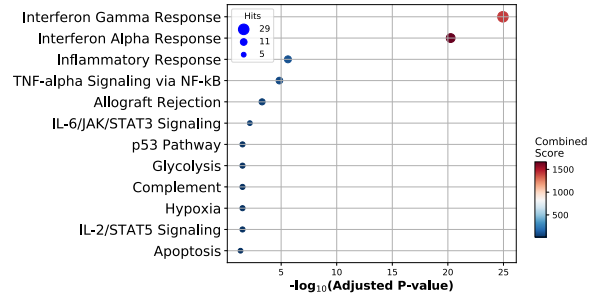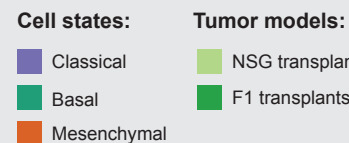

Supplement: NIHMS1831177-supplement-7.pdf [file NIHMS1831177-supplement-7.pdf]
