# Supplementary material
Source: PubMed Central journal article supplement (PMC9532381)

**A**

Accessibility of Classical, Basal and Mesenchymal genes

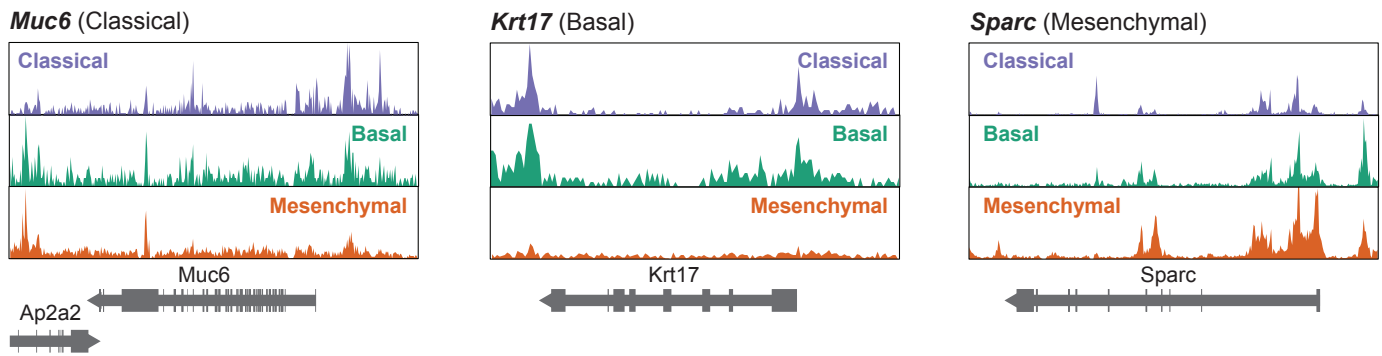**B**

Expression of lung adenocarcinoma high-plasticity cell state (HPCS) signature genes

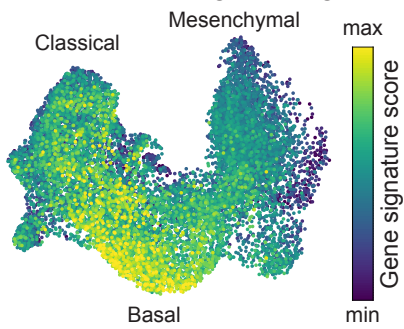**C**

Expression and chromatin accessibility of *Lgr5* locus in cell states (autochthonous)

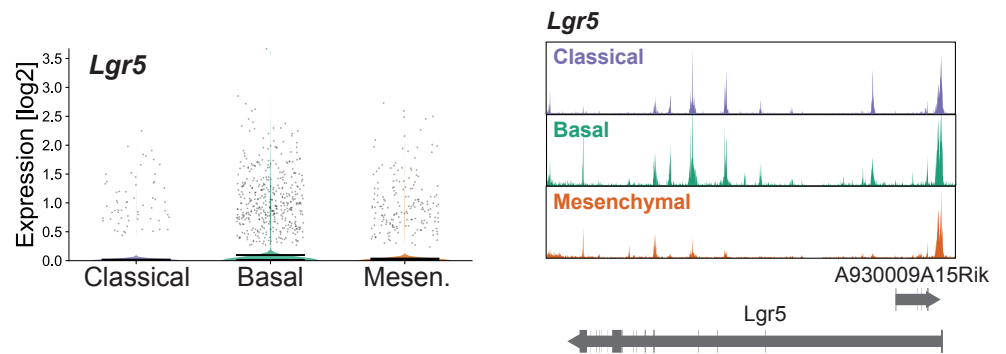

Supplement: NIHMS1831177-supplement-8.pdf [file NIHMS1831177-supplement-8.pdf]
