# Supplementary material
Source: PubMed Central journal article supplement (PMC9532381)

**A** Expression of basal, luminal, and mesenchymal markers in Lgr5-GFP reporter cells

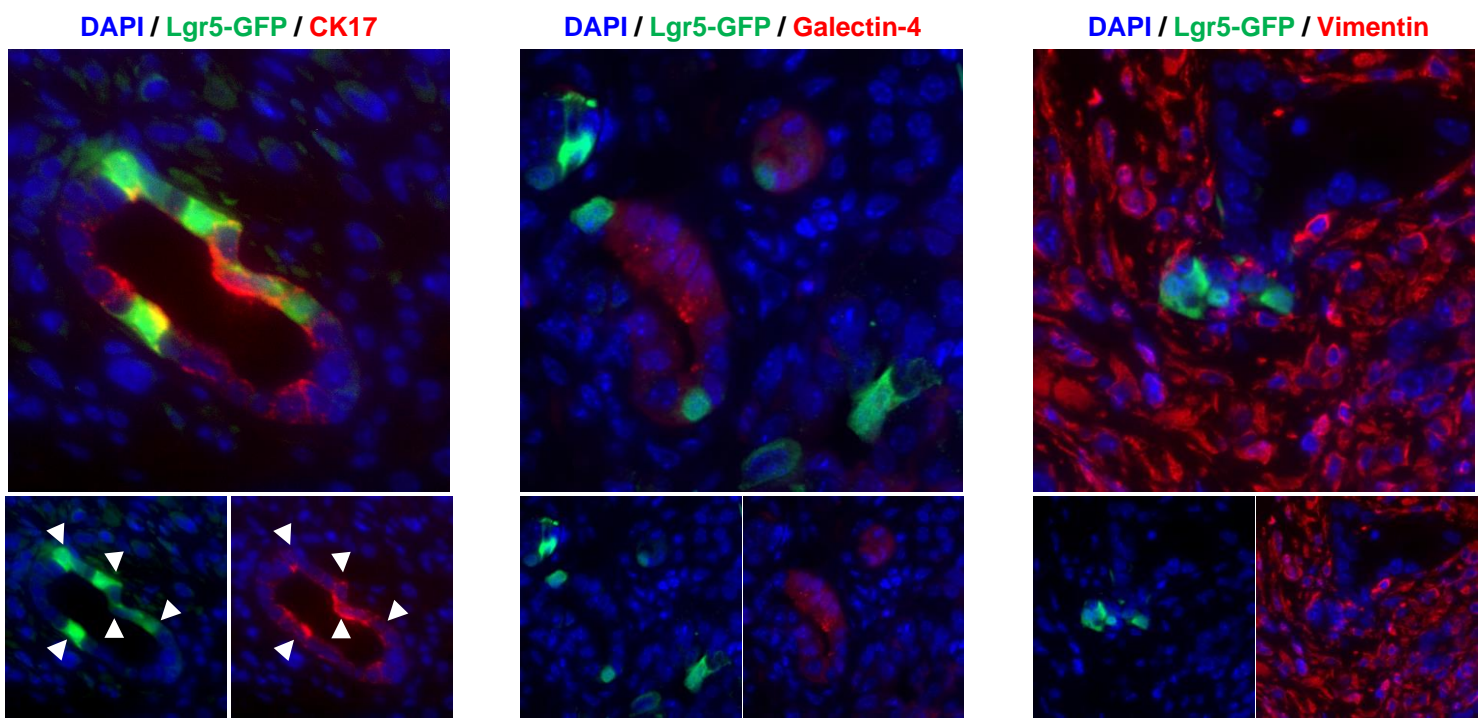

**B** LGR5 expression in PDAC vs. normal pancreas

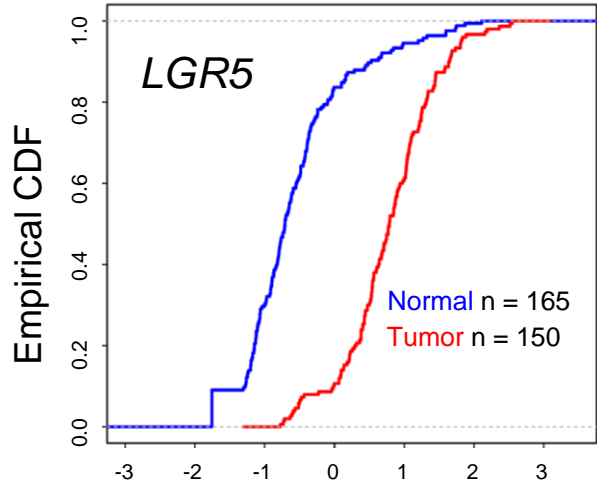

**C** LGR5 mRNA *in situ* hybridization in human PDAC

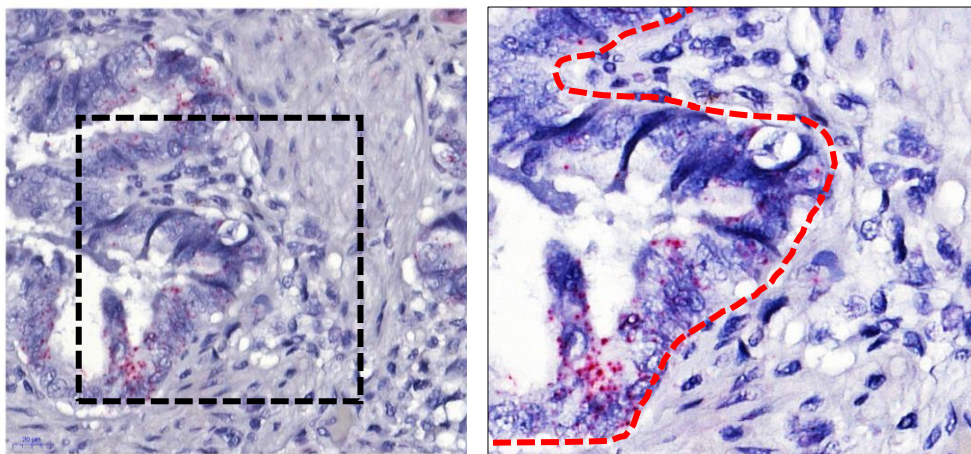

**d** LGR5 expression in published human PDAC scRNA-seq data (dataset from Peng et al., 2019)

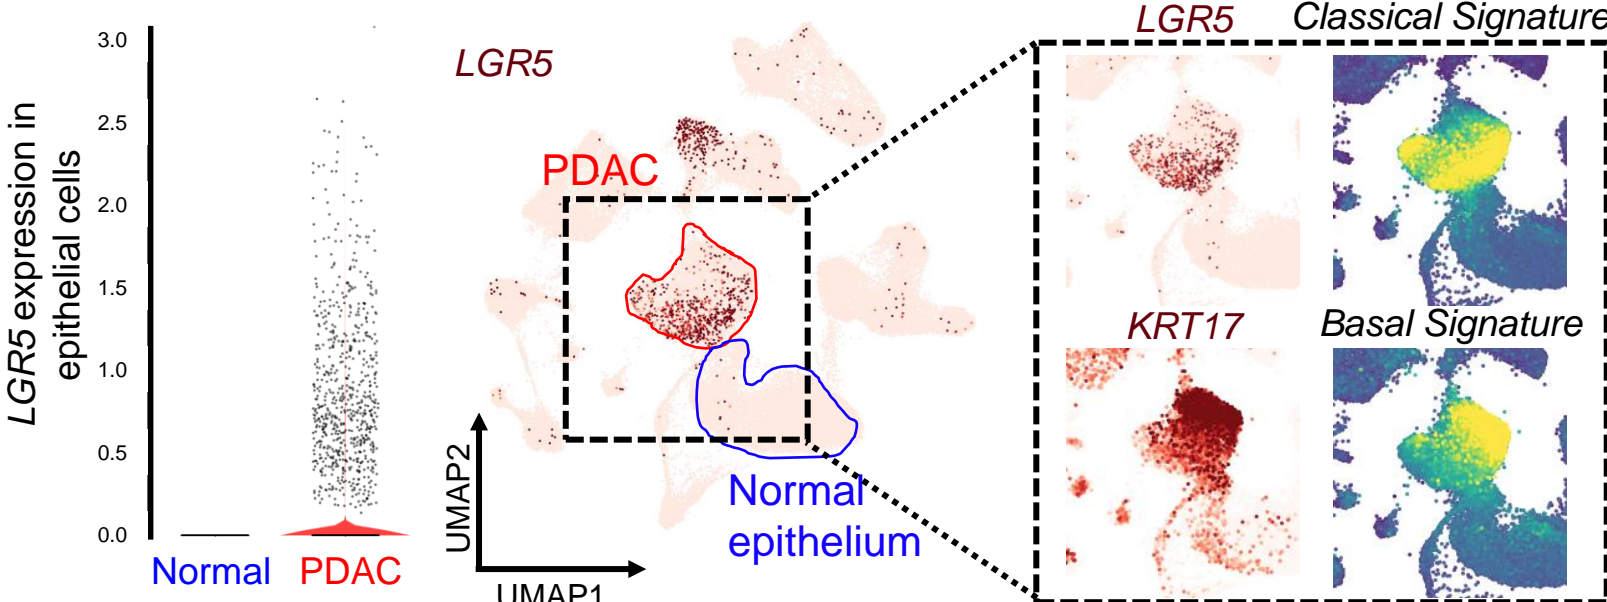

Supplement: NIHMS1831177-supplement-9.pdf [file NIHMS1831177-supplement-9.pdf]
