# Supplementary material
Source: PubMed Central journal article supplement (PMC9532381)

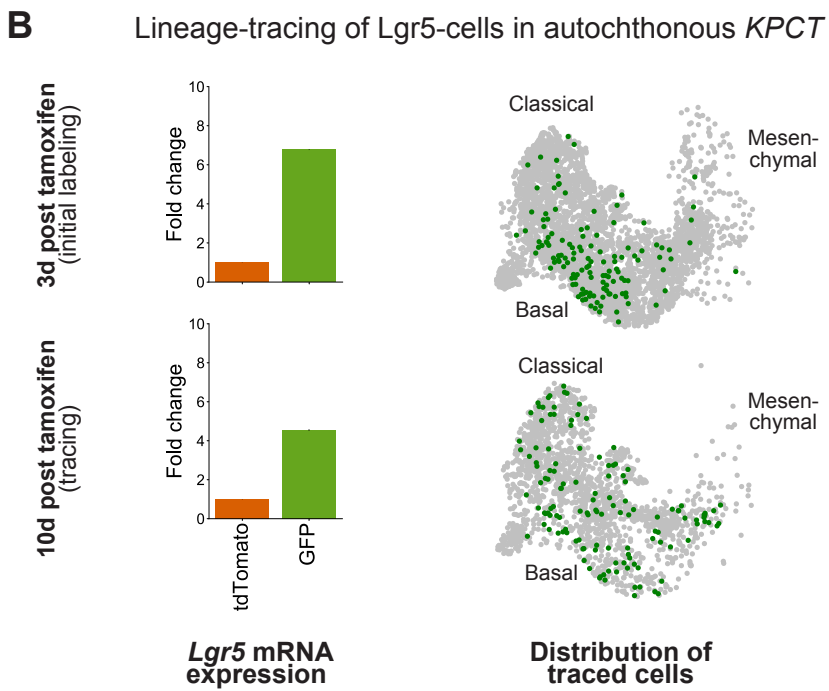

**A** Compositional entropy of traced cells (fragment transplants)

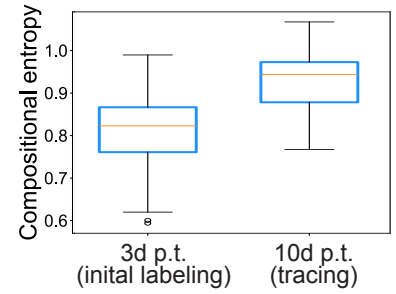

**C** Compositional entropy of traced cells (autochthonous tumors)

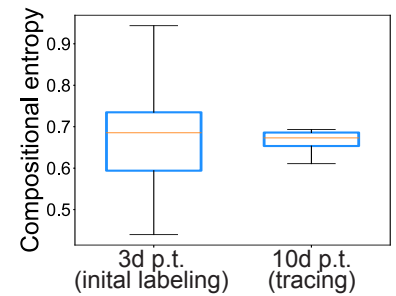

**D** Phenotypic volume of traced cells (autochthonous tumors)

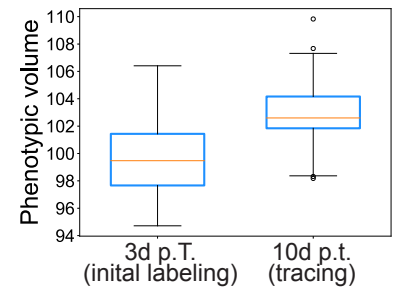

Supplement: NIHMS1831177-supplement-10.pdf [file NIHMS1831177-supplement-10.pdf]
