# Supplementary material
Source: PubMed Central journal article supplement (PMC9532381)

## Single-cell RNA-sequencing

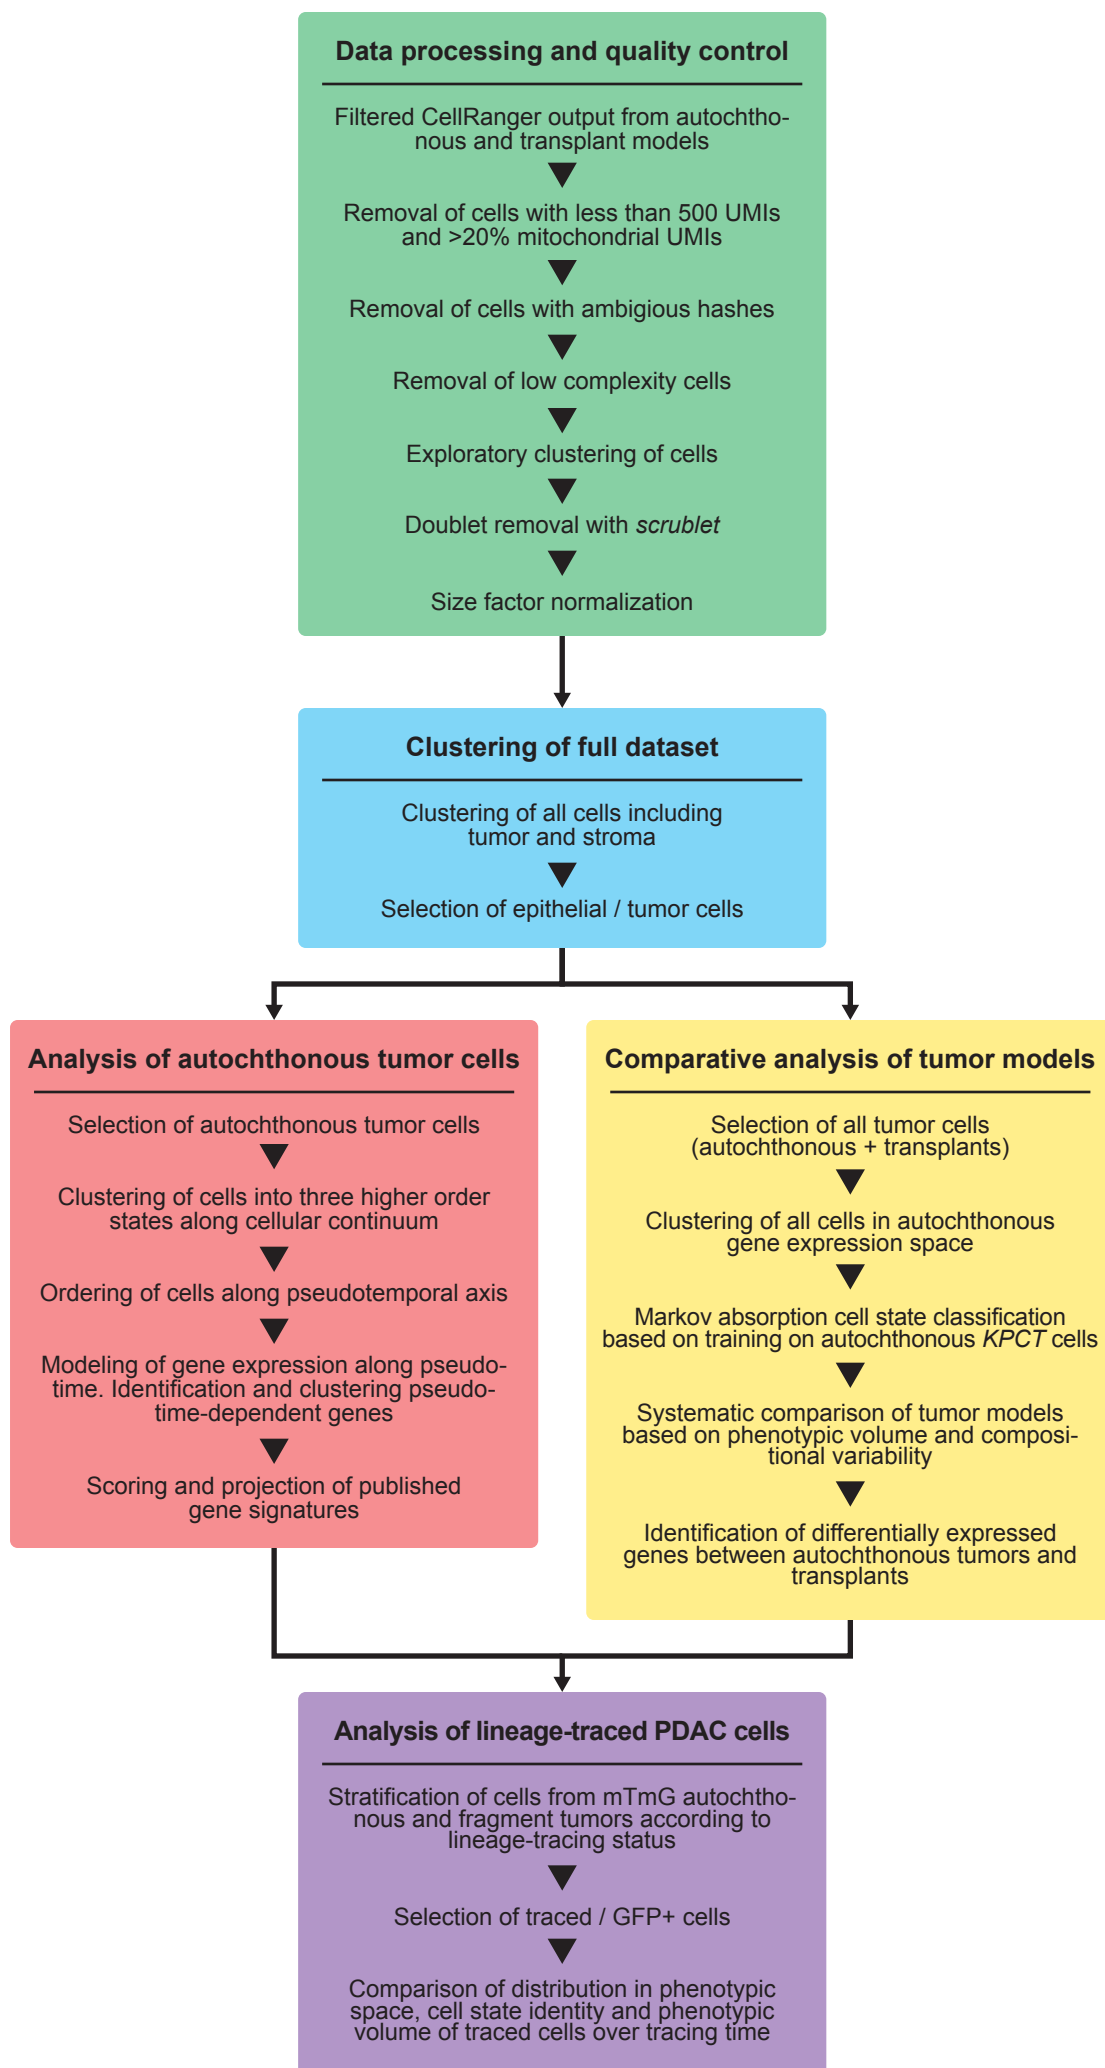

## Single-cell ATAC-sequencing

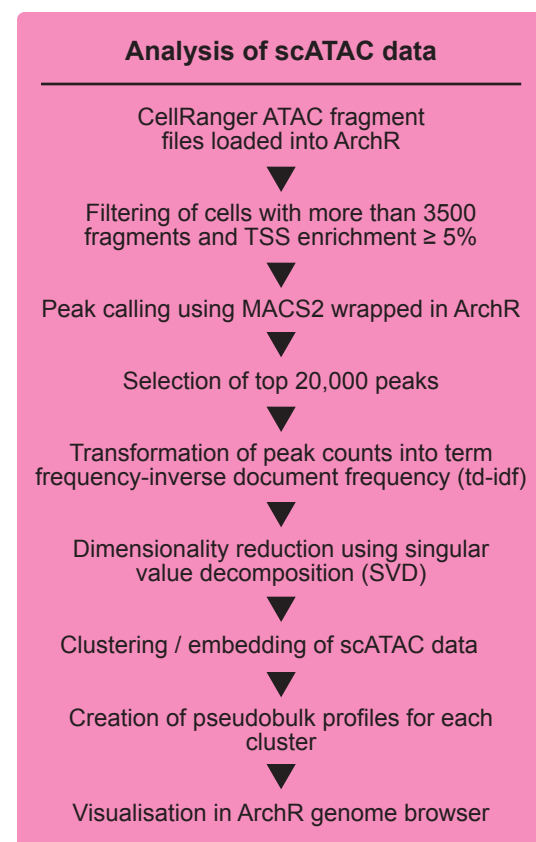

Supplement: NIHMS1831177-supplement-2.pdf [file NIHMS1831177-supplement-2.pdf]

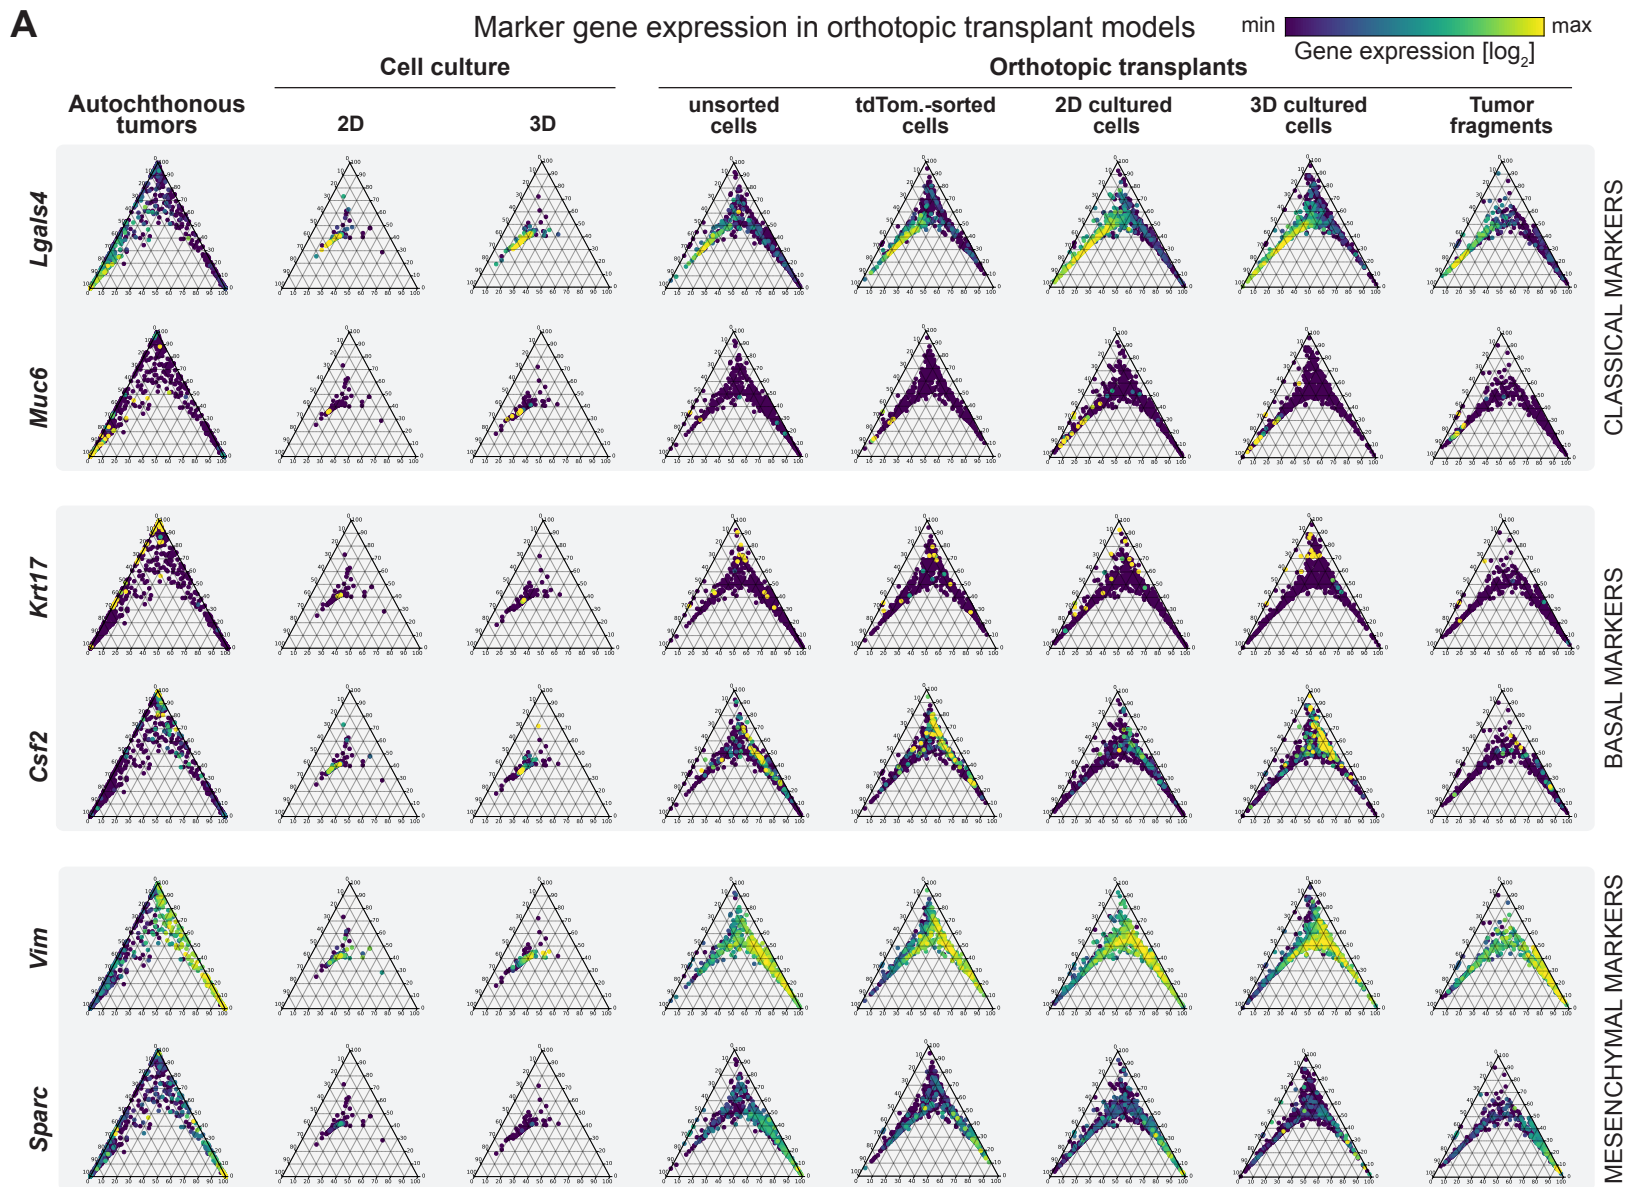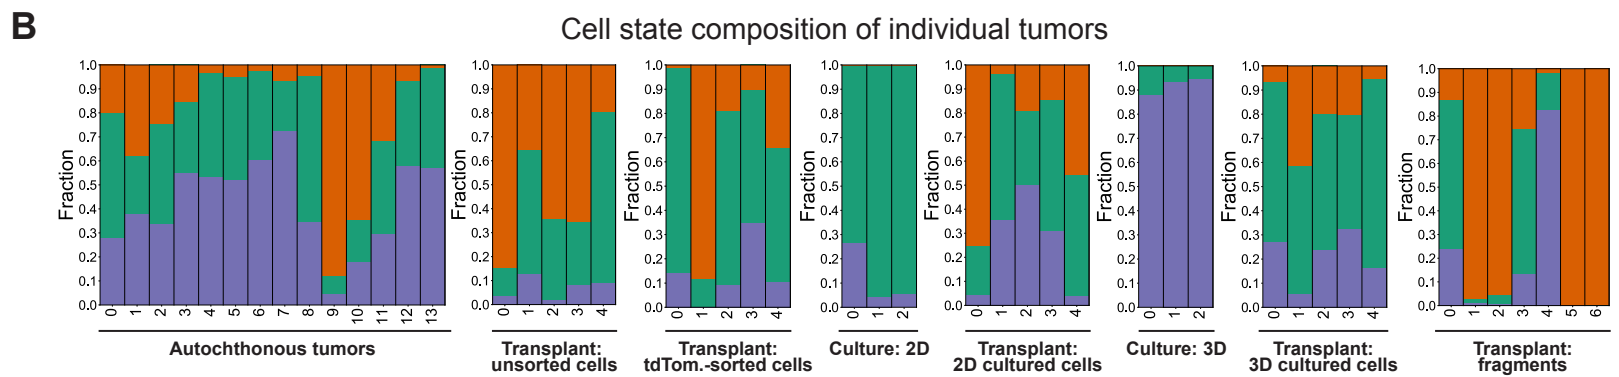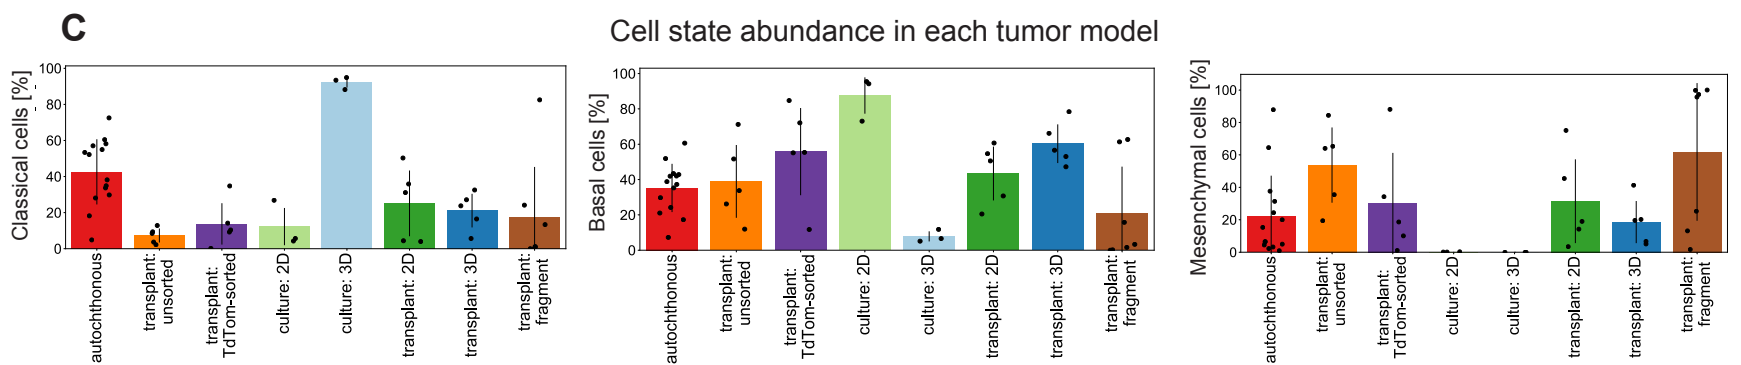

Supplement: NIHMS1831177-supplement-4.pdf [file NIHMS1831177-supplement-4.pdf]

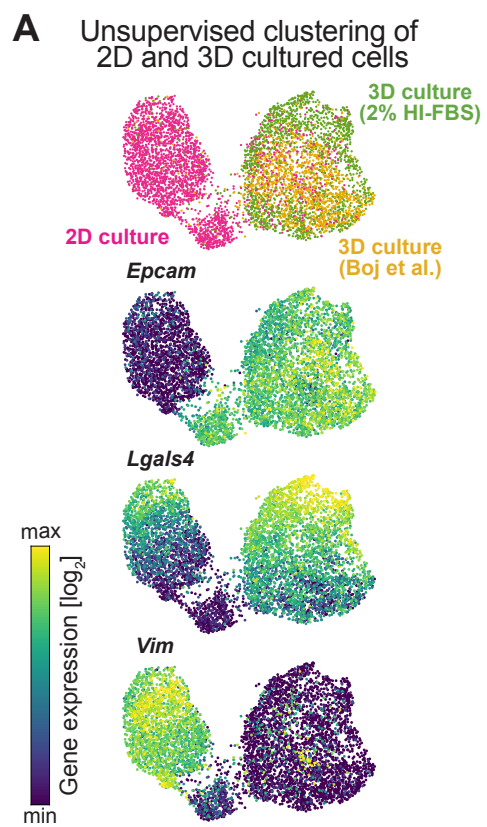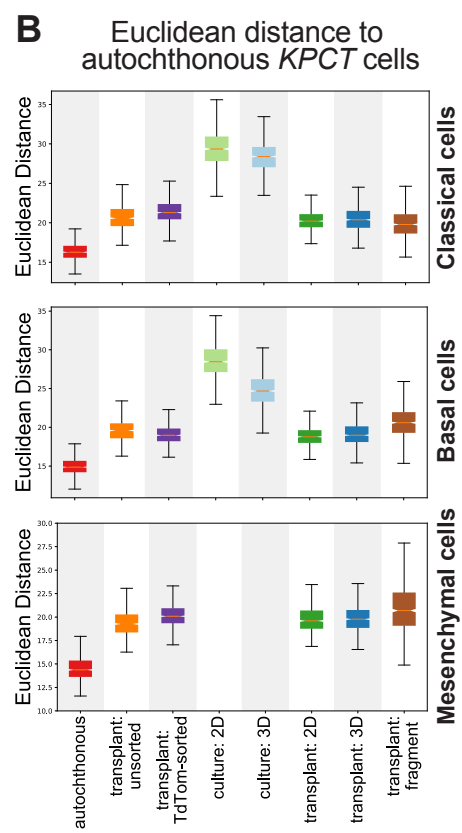

Supplement: NIHMS1831177-supplement-6.pdf [file NIHMS1831177-supplement-6.pdf]
